RESEARCH ARTICLE

# Fructo-oligosaccharides and intestinal barrier function in a methionine–choline-deficient mouse model of nonalcoholic steatohepatitis

Kotaro Matsumoto<sup>1</sup>, Mayuko Ichimura<sup>2</sup>, Koichi Tsuneyama<sup>3</sup>, Yuki Moritoki<sup>4</sup>, Hiromichi Tsunashima<sup>1</sup>, Katsuhisa Omagari<sup>5</sup>, Masumi Hara<sup>6</sup>, Ichiro Yasuda<sup>1</sup>, Hiroshi Miyakawa<sup>6</sup>, Kentaro Kikuchi<sup>6\*</sup>

**1** Department of Gastroenterology, Teikyo University Mizonokuchi Hospital, Takatsu-ku, Kawasaki-city, Kanagawa, Japan, **2** Department of Food Science and Nutrition, Nara Women's University, Kita-Uoya Nishimachi, Nara-city, Nara, Japan, **3** Department of Pathology and Laboratory Medicine, Institute of Biomedical Sciences, Tokushima University Graduate School, Tokushima-city, Tokushima, Japan, **4** Department of General Medical Practice and Laboratory Diagnostic Medicine, Akita University Graduate School of Medicine, Akita-city, Akita, Japan, **5** Department of Nutrition, Faculty of Nursing and Nutrition, University of Nagasaki, Nagayo-cho, Nishi-Sonogi-gun, Nagasaki, Japan, **6** The Fourth Department of Internal Medicine, Teikyo University Mizonokuchi Hospital, Takatsu-ku, Kawasaki-city, Kanagawa, Japan

\* [kentaro@med.teikyo-u.ac.jp](mailto:kentaro@med.teikyo-u.ac.jp)

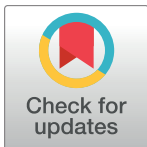

**OPEN ACCESS**

**Citation:** Matsumoto K, Ichimura M, Tsuneyama K, Moritoki Y, Tsunashima H, Omagari K, et al. (2017) Fructo-oligosaccharides and intestinal barrier function in a methionine–choline-deficient mouse model of nonalcoholic steatohepatitis. PLoS ONE 12(6): e0175406. <https://doi.org/10.1371/journal.pone.0175406>

**Editor:** Pavel Strnad, Medizinische Fakultät der RWTH Aachen, GERMANY

**Received:** August 30, 2016

**Accepted:** March 24, 2017

**Published:** June 20, 2017

**Copyright:** © 2017 Matsumoto et al. This is an open access article distributed under the terms of the [Creative Commons Attribution License](https://creativecommons.org/licenses/by/4.0/), which permits unrestricted use, distribution, and reproduction in any medium, provided the original author and source are credited.

**Data Availability Statement:** All relevant data are within the paper.

**Funding:** This work was supported by a grant from the Ministry of Health, Labour and Welfare of Japan and JSPS KAKENHI Grant-in-Aid for Scientific Research (C) Number 26460174. <https://kaken.nii.ac.jp/ja/grant/KAKENHI-PROJECT-26460174/>. The funder had no role in this study.

**Competing interests:** We have no competing interests.

## Abstract

Impairments in intestinal barrier function, epithelial mucins, and tight junction proteins have been reported to be associated with nonalcoholic steatohepatitis. Prebiotic fructo-oligosaccharides restore balance in the gastrointestinal microbiome. This study was conducted to determine the effects of dietary fructo-oligosaccharides on intestinal barrier function and steatohepatitis in methionine–choline-deficient mice. Three groups of 12-week-old male C57BL/6J mice were studied for 3 weeks; specifically, mice were fed a methionine–choline-deficient diet, a methionine–choline-deficient diet plus 5% fructo-oligosaccharides in water, or a normal control diet. Fecal bacteria, short-chain fatty acids, and immunoglobulin A (IgA) levels were investigated. Histological and immunohistochemical examinations were performed using mice livers for CD14 and Toll-like receptor-4 (TLR4) expression and intestinal tissue samples for IgA and zonula occludens-1 expression in epithelial tight junctions. The methionine–choline-deficient mice administered 5% fructo-oligosaccharides maintained a normal gastrointestinal microbiome, whereas methionine–choline-deficient mice without prebiotic supplementation displayed increases in *Clostridium* cluster XI and subcluster XIVa populations and a reduction in *Lactobacillales* spp. counts. Methionine–choline-deficient mice given 5% fructo-oligosaccharides exhibited significantly decreased hepatic steatosis ( $p = 0.003$ ), decreased liver inflammation ( $p = 0.005$ ), a decreased proportion of CD14-positive Kupffer cells ( $p = 0.01$ ), decreased expression of TLR4 ( $p = 0.04$ ), and increases in fecal short-chain fatty acid and IgA concentrations ( $p < 0.04$ ) compared with the findings in methionine–choline-deficient mice that were not administered this prebiotic. This study illustrated that in the methionine–choline-deficient mouse model, dietary fructo-oligosaccharides can restore normal gastrointestinal microflora and normal intestinal epithelial barrier function, and decrease steatohepatitis. The findings support the role of prebiotics, such as fructo-oligosaccharides, in maintaining a normal gastrointestinal microbiome; they also support the

need for further studies on preventing or treating nonalcoholic steatohepatitis using dietary fructo-oligosaccharides.

## Introduction

Nonalcoholic fatty liver disease (NAFLD) is an organ phenotype in metabolic syndrome that is often complicated by obesity, dyslipidemia, and diabetes mellitus [1]. Nonalcoholic steatohepatitis (NASH) is part of the spectrum of NAFLD, combined with hepatic inflammation and fibrosis, leading to cirrhosis [2]. It was reported that the 5-year cumulative incidence of liver cancer in Japanese patients with NASH and cirrhosis was 20% [3]. Regardless of the examination of many researchers, it is not apparent which factor promotes the progression of NAFLD to NASH, and, therefore, a radical curative method is unknown.

According to an analysis of the microbial flora and a study of metabolic products, intestinal bacteria participate in organic homeostasis and pathological changes in the living body [4]. Abnormality of the microbial flora is called dysbiosis, which denotes a lack of diversity of intestinal bacteria because of a disorder of quantitative and qualitative balance [5]. Additionally, in NASH, dysbiosis has been determined via fecal examination, and it is caused by an unbalanced diet or obesity, suggesting that improvements of the microbial flora are correlated with improvements of hepatic steatosis [6].

Dysbiosis leads to biological and immunological intestinal barrier dysfunction through shortages of nutrients in intestinal epithelial cells and mucosal immune deficiency [7–9]. Recently, intestinal barrier dysfunction was noticed in the pathogenesis of NAFLD [10]. A key component of the onset of NASH is the influx of a large amount of pathogen-associated molecular patterns (PAMPs) through disrupted intestinal mucosal epithelium [11, 12] and Kupffer cell hypersensitivity to PAMPs in the liver [13].

After some animal experiments and clinical trials, it was revealed that amelioration of dysbiosis improves intestinal barrier function, indicating that this strategy could represent an effective treatment for certain diseases [14]. Prebiotics are food components that are not digested or absorbed in the upper gastrointestinal tract. They are fermented selectively by beneficial types of intestinal bacteria, favorably altering the composition of microbial flora and conferring healthy effects on both the gastrointestinal tract and entire body of the host [15]. Prebiotics such as oligosaccharides and dietary fibers have such effects, and, in particular, fructo-oligosaccharides (FOSs) meet all of the requirements to serve as prebiotics. In this study, to examine whether FOSs can be used to treat NASH, we hypothesized that FOSs can improve dysbiosis and delay the onset of NASH, and examined the hypothesis using a NASH animal model.

## Materials and methods

### Generation of the NASH mouse model

Six methionine–choline-deficient diet (MCD) mice (12-week-old male C57BL/6J mice, Sankyo Labo Service Co. Inc., Tokyo, Japan) were fed an MCD (A02082002B, Research Diets Inc., New Brunswick, NJ, USA) and purified water for 3 weeks and housed under conventional conditions. In addition, six FOS-treated MCD (MCD + FOS) mice were additionally administered 5% FOS (Meiologo W, Meiji Co., Tokyo, JAPAN) in drinking water during the same period. Six 12-week-old male mice that were fed a control diet (A02082003B, Research Diets Inc.) and purified water for 3 weeks and maintained under the same conditions served as the control group.

After the treatment period, 1.2 g of freshly collected feces were cryopreserved for analysis of the microbial flora, short-chain fatty acid and IgA concentration.

After the mice were sacrificed by cervical dislocation, alanine aminotransferase (ALT) levels were measured in serum samples prepared from venous blood. Mouse livers were extracted after perfusion with phosphate-buffered saline (PBS) containing 0.5% bovine serum albumin and 0.04% ethylenediaminetetraacetic acid (EDTA) (PBS buffer). Half of the liver was fixed in 4% paraformaldehyde (PFA) for hematoxylin–eosin (HE) staining and then evaluated pathologically according to the NAFLD activity score (NAS) [16]. The remainder of the liver was used for flow cytometric analysis. The extracted ileum, colon, and half of the cecum were washed with PBS buffer and fixed in 4% PFA for HE and immunohistochemical staining. The rest of the cecum was used for flow cytometric analysis. The IgA density of feces was measured using a Mouse IgA ELISA Quantitation Kit (Bethyl Laboratories, Inc., Montgomery, TX, USA). This study was performed in strict accordance with the recommendations in the Guide for the Care and Use of Laboratory Animals of the National Institutes of Health. All efforts were made to minimize suffering. The protocol was approved by the Teikyo University's School of Medicine's Animal Ethics Committee (approval number: 14–030).

### Analysis of the microbial flora and short-chain fatty acids in feces

To identify bacterial species, the partial amino acid sequence of 16S rDNA was analyzed using the terminal restriction fragment length polymorphism method according to Nagashima's method [17]. Briefly, 20 mg of feces were dissolved in 0.2 ml of distilled water and washed by centrifugation. The pellet was dissolved with 250  $\mu$ l of TE buffer containing 100-mM Tris-HCl and 40-mM EDTA. After centrifugation with 0.6 g of DNA-extraction beads, the supernatant was collected and mixed with 150  $\mu$ l of benzyl chloride and 50  $\mu$ l of 10% sodium lauryl sulfate for 30 min at 50°C. After centrifugation with 150  $\mu$ l of 3-M sodium acetate, the supernatant was collected and mixed with isopropyl alcohol for DNA extraction. Next, 0.5 U of HotStarTaq DNA polymerase (Qiagen, Tokyo, Japan) was added to 10 ng of DNA, and 16S rDNA was amplified by polymerase chain reaction using the 5' terminal fluoro-labeled primers 516f and 1510r. After digestion with *BsII*, the fragment was analyzed using an ABI PRISM 3130xl DNA Sequencer (Applied Biosystems, Carlsbad, CA, USA) and GeneMapper (Applied Biosystems). The length of each fragment was distinguished using operational taxonomic units, and the peak area ratio was presented as a percentage. One gram of feces was pulverized under sterile conditions. Fecal short-chain fatty acids were analyzed using a Prominence high-performance liquid chromatography system (Shimazu Corp., Kyoto, Japan).

### Immunohistochemical staining

The 4% PFA-fixed tissue slices were subjected to an immuno-enzymatic method. Endogenous peroxidase activity was blocked using H<sub>2</sub>O<sub>2</sub> containing Tris-buffered saline (TBS). Then, overnight incubation was performed with  $\times 200$  rabbit polyclonal anti-mouse zonula occludens-1 (ZO-1) (AVIVA Systems Biology Corp., San Diego, CA, USA),  $\times 400$  goat polyclonal anti-mouse IgA (Gene Tex Inc., Irvine, CA, USA), and  $\times 200$  rabbit polyclonal anti-mouse TNF-alpha (Lifespan Biosciences, Seattle, WA, USA). After washing with TBS-Tween, the tissue slices were incubated with a peroxidase-conjugated immune polymer for primary antibodies (Envision-PO for rabbit, Dako, Glostrup, Denmark) as a secondary antibody at room temperature for 1 h. After washing with TBS, 3,3'-diaminobenzidine was used for color development. Hematoxylin was used for nuclear counterstaining. In the ileum and colon, IgA-positive cells were counted in the range of 1 centimeter randomly selected. The mean number of IgA-positive cells was calculated. Ileal villus heights were measured in the same range, and mean heights were calculated.

## Flow cytometric analysis

Hepatic and cecal mononuclear cells were isolated as follows: Mouse livers and the cecum were filtered through a 40  $\mu\text{m}$  cell strainer (BD Falcon, Durham, NC, USA) and re-suspended in PBS buffer. The solution was centrifuged at 500 rpm for 5 min, and the supernatant was centrifuged again at 1500 rpm for 5 min. After discarding the supernatant, the precipitate was dissolved in PBS buffer, layered over 1.077-g/ml Lymphoprep (Axis-Shield Proc. AS, Oslo, Norway), and centrifuged at 1500 rpm for 15 min. The mononuclear cell layer was collected and washed with PBS buffer. Viable cell counting was performed using trypan blue staining.

Cells ( $1 \times 10^6$ ) were pre-incubated with 1  $\mu\text{l}$  of purified anti-mouse CD16/32 (BioLegend, San Diego, CA, USA) in 24  $\mu\text{l}$  of cell-staining buffer (BioLegend) at 4°C for 10 min and then incubated with 25  $\mu\text{l}$  of a solution containing cell-staining buffer and appropriate quantities of fluorescein isothiocyanate-conjugated anti-mouse F4/80 and CD19 (BioLegend), phycoerythrin-conjugated anti-mouse CD14 (BioLegend), allophycocyanin (APC)/Alexa Fluor 750-conjugated anti-mouse CD11b (BioLegend), or APC-conjugated anti-mouse Toll-like receptor 4 (TLR4) and CD38 (BioLegend) at 4°C for 15 min in the dark. Rat IgG2a-kappa (BioLegend) was used as the isotype control. Stained cells were washed, suspended in 200  $\mu\text{l}$  of PBS buffer, and dispensed into a 96-well round-bottom plate. Flow cytometric analyses were performed using a BD FACSArray flow cytometer (BD Immunocytometry Systems, San Jose, CA, USA) with FACSArray software (BD Immunocytometry Systems). Kupffer cells were identified as the F4/80<sup>+</sup> CD11b<sup>+</sup>. B cells were identified as the CD19<sup>+</sup> cell population. The mean fluorescence intensity (MFI) ratios of TLR4 and CD38 were calculated as the sample MFI divided by the isotype control MFI.

## Statistical analysis

Serum ALT levels, NAS, TLR4 MFI ratios, fecal short-chain fatty acid concentrations, numbers of IgA-positive cells in the small intestine, fecal IgA concentrations, and cecal length are presented as the mean  $\pm$  standard error mean. Statistical analysis was performed by the nonparametric Mann–Whitney test and one-way ANOVA followed by Tukey post-test using GraphPad Prism version 6.0 for Macintosh (GraphPad Software, San Diego, CA, USA), and differences were considered significant at  $p < 0.05$ .

## Results

### MCD-induced dysbiosis and the effect of FOSs

To confirm whether dysbiosis occurs because of MCD, we analyzed mice feces. Regarding the bacterial balance in feces of MCD mice compared with that in control mice's feces, it was recognized that *Clostridium* cluster XI levels increased from 3% to 8.7%, and those of the *Clostridium* subcluster XIVa increased from 5.9% to 26.3%; on the contrary, counts of *Lactobacillales* spp. decreased from 45.9% to 5.1% (Fig 1). FOSs improved the bacterial levels, considering that after the treatment, the counts of *Clostridium* cluster XI and *Clostridium* subcluster XIVa decreased to 4.6% and 2.7%, respectively, and those of *Lactobacillales* spp. increased to 27.1%, in line with the bacterial balance of control mice. The color of feces in MCD mice was whitish, compared to brownish in MCD + FOS and control mice, reflecting a change of the bacterial balance.

### Histological findings of the liver

To confirm whether MCD-induced NASH was improved by FOS, we analyzed serum ALT and liver tissue samples. Serum ALT levels ( $72.2 \pm 10.6$  U/l) were significantly higher in MCD

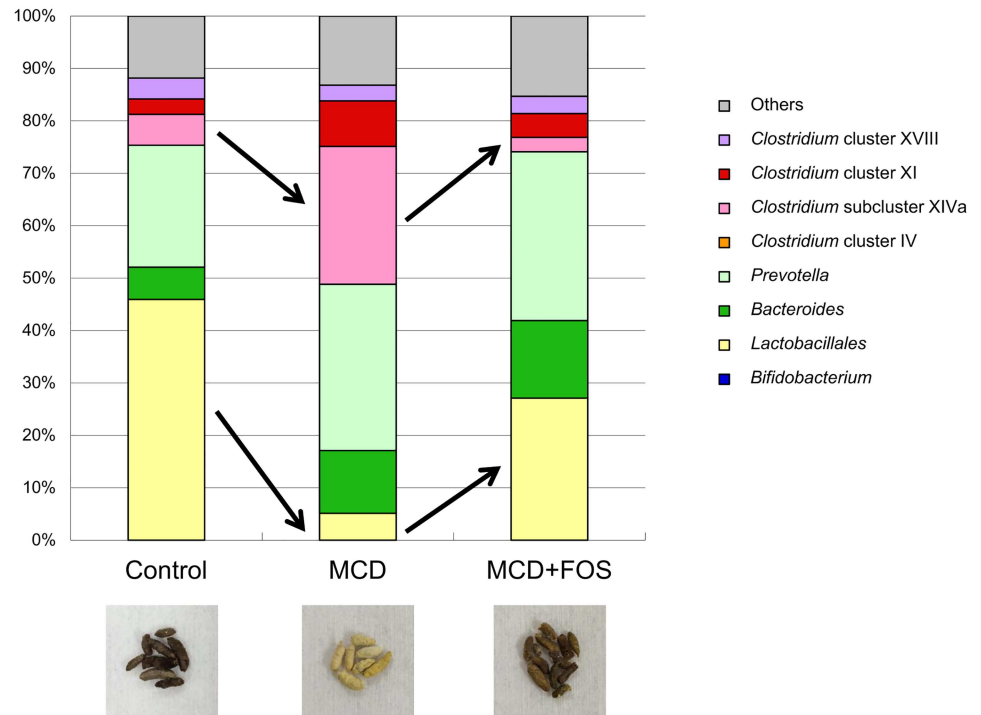

**Fig 1. Terminal restriction fragment length polymorphism analysis of microbiological flora and macroscopic findings of feces from control, methionine–choline-deficient diet (MCD)-fed, and FOS-treated MCD-fed mice.**

<https://doi.org/10.1371/journal.pone.0175406.g001>

mice than in control mice ( $29.8 \pm 1.8$  U/l,  $p = 0.0004$ ; Fig 2a), and macroscopically, the liver was yellow (Fig 2b). Meanwhile, serum ALT levels ( $37.7 \pm 7.3$ U/l) were significantly lower in MCD + FOS mice than in MCD mice ( $p = 0.0005$ ), and the liver was brownish, as observed in control mice. Hepatic steatosis and inflammatory cell infiltrate were observed by HE staining of liver tissue in MCD mice (Fig 2d), whereas those changes were restrained in MCD + FOS mice. The NAS in MCD mice liver revealed scores of  $2.3 \pm 0.4$ ,  $1.8 \pm 0.3$ , and  $1.3 \pm 0.4$  points for steatosis, centrilobular hepatitis, and ballooning degeneration, respectively, whereas the value for each category was significantly decreased by  $0.5 \pm 0.5$  points in MCD + FOS mice (steatosis,  $p = 0.003$ ; centrilobular hepatitis,  $p = 0.005$ ; ballooning degeneration,  $p = 0.03$ ; Fig 2c). TNF-alpha staining of the liver of MCD mice showed positive staining of hepatocyte surrounding central vein; however, no staining was observed in FOS-treated mice (Fig 2e).

### Histological findings of the small intestine

We hypothesized that MCD induces dysbiosis-mediated attenuation of intestinal barrier function, which would be improved by FOS; we analyzed villus heights and ZO-1 staining of the ileum. Remarkable changes were not observed in MCD mice via HE staining of the ileal tissues; however, villus extension was observed in MCD + FOS mice (Fig 3a). Villus heights were significantly higher in MCD + FOS mice ( $221.9 \pm 8.6 \mu\text{m}$ ) than in Control ( $192.1 \pm 10.9 \mu\text{m}$ ) and MCD mice ( $140.9 \pm 25.2 \mu\text{m}$ ) ( $p < 0.01$ ). Length of the small intestine was longer in MCD + FOS mice ( $33.7 \pm 5.6$  mm) than in Control ( $30.1 \pm 4.5$  mm) and MCD mice ( $23.0 \pm 2.7$  mm) ( $p < 0.01$ ). Length of the small intestine was also longer in MCD + FOS mice ( $7.0 \pm 3.9$  mm) than in MCD mice ( $5.1 \pm 2.5$  mm) ( $p = 0.02$ ) but not significantly different from that in

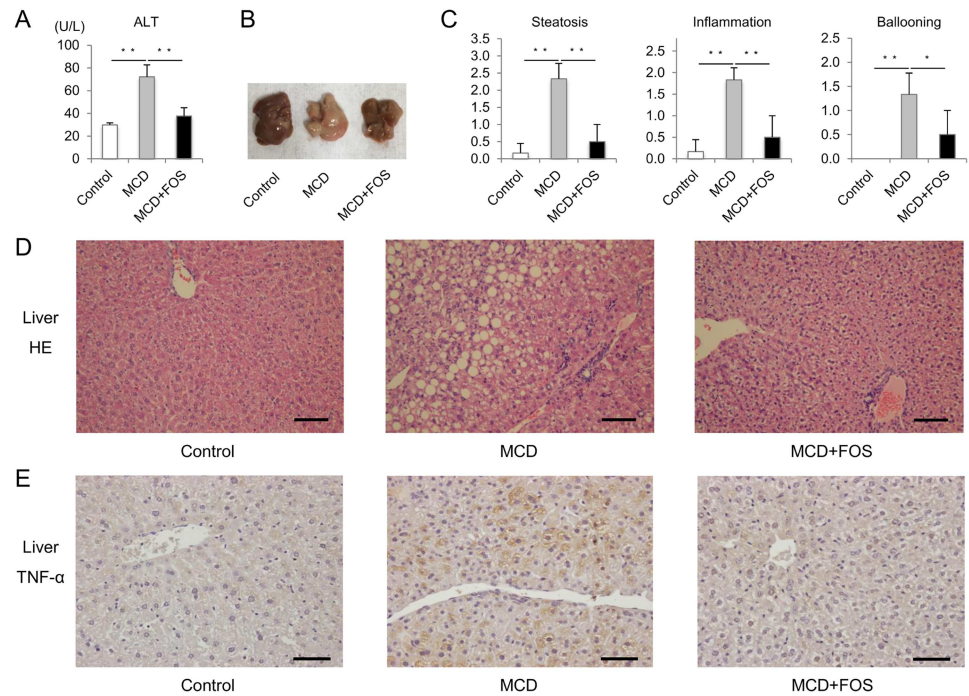

**Fig 2. MCD-fed mice with or without FOS treatment.** A. Mean values of serum alanine aminotransferase (ALT). \*\*\*  $p < 0.001$ . B. Macroscopic findings of the liver. C. Nonalcoholic fatty liver disease activity score. \*\*  $p < 0.01$ , \*  $p = 0.03$ . Histological findings of the liver (D. hematoxylin–eosin stain, E. TNF-alpha stain.  $\times 100$ . Bar = 100  $\mu\text{m}$ ).

<https://doi.org/10.1371/journal.pone.0175406.g002>

Control mice ( $7.3 \pm 2.1$  mm). When we examined the expression of tight junction proteins via ZO-1 staining, we recognized apical linear staining of the ileal epithelial cells and attenuation of the staining in MCD mice (Fig 3b). FOSs improved ZO-1 staining.

### Status of Kupffer cells

We hypothesized that MCD-mediated attenuation of intestinal barrier function could lead to higher LPS-induced Kupffer cell activation as these cells are activated by TLR4. Thus we measured total and CD14<sup>+</sup> Kupffer cell numbers and MFI ratio of TLR4 using flow cytometry. The ratio of CD14<sup>+</sup> cells among F4/80<sup>+</sup> CD11b<sup>+</sup> Kupffer cells was  $8.1\% \pm 1.7\%$  in control mice versus  $37.6\% \pm 6.7\%$  in MCD mice ( $p = 0.01$ ) and  $14.5\% \pm 2.8\%$  in MCD + FOS mice ( $p = 0.01$ ; Fig 4a). The number of total Kupffer cells was  $984.7 \pm 146.8$  in control mice versus  $3426.5 \pm 663.3$  in MCD mice ( $p = 0.003$ ) and  $2612.2 \pm 452.5$  in MCD + FOS mice ( $p = 0.07$ ; Fig 4b). CD14<sup>+</sup> Kupffer cell counts were  $81.2 \pm 27.2$  in control mice versus  $1335.7 \pm 454.7$  in MCD mice ( $p = 0.001$ ) and  $383.3 \pm 101.4$  in MCD + FOS mice ( $p = 0.002$ ; Fig 4b). The MFI ratio of TLR4 in CD14<sup>+</sup> Kupffer cells was  $7.8\% \pm 0.5\%$  in control mice, compared to  $10.6\% \pm 0.1\%$  in MCD mice ( $p = 0.04$ ) and  $8.5\% \pm 0.2\%$  in MCD + FOS mice ( $p = 0.04$ ; Fig 4c).

### Analysis of short-chain fatty acids in feces

We hypothesized that MCD-mediated attenuation of intestinal barrier function was due to a reduction of *Lactobacillales*-produced short-chain fatty acids. Thus we measured short-chain fatty acids in feces. Upon analyzing short-chain fatty acids in feces, it was recognized that the concentrations of acetic acid ( $0.5 \pm 0.1$  mg/g, vs. Control's  $2.2 \pm 0.1$  mg/g;  $p = 0.003$ ), propionic

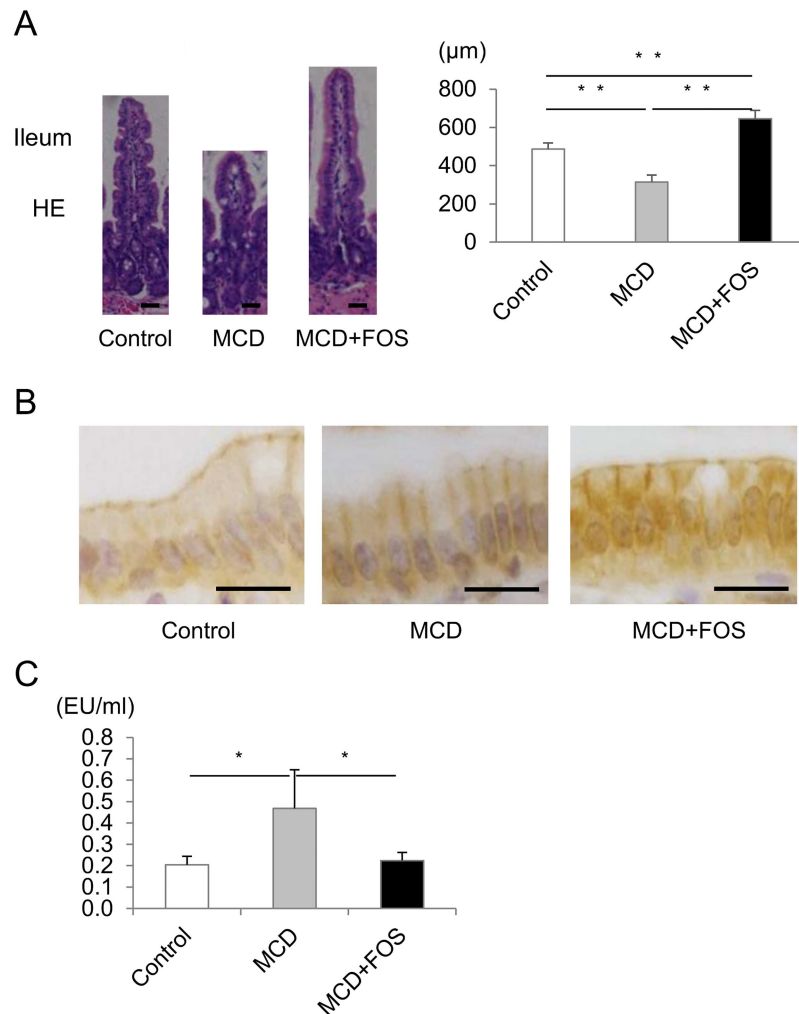

**Fig 3.** A. Mean villus heights (\*\*  $p < 0.01$ ) hematoxylin–eosin (HE,  $\times 400$ . *Bar* = 50  $\mu\text{m}$ ) and B. zonula occludens-1 (ZO-1,  $\times 600$ . *Bar* = 50  $\mu\text{m}$ ) staining in the ileal villus epithelium of methionine–choline-deficient diet-fed mice with or without the fructo-oligosaccharide treatment. C. Serum endotoxin level. \*  $p < 0.05$ .

<https://doi.org/10.1371/journal.pone.0175406.g003>

acid ( $0.1 \pm 0.1$  mg/g, vs. Control's  $0.4 \pm 0.1$  mg/g;  $p = 0.002$ ), and n-butyric acid ( $0.1 \pm 0.1$  mg/g, vs. Control's  $0.6 \pm 0.1$  mg/g,  $p = 0.003$ ) were significantly decreased in MCD mice (Fig 5). In MCD + FOS mice, the concentrations of acetic acid ( $0.9 \pm 0.3$  mg/g;  $p = 0.04$ ) and propionic acid ( $0.2 \pm 0.1$  mg/g;  $p = 0.001$ ) were significantly improved, whereas that of n-butyric acid ( $0.6 \pm 0.1$  mg/g;  $p = 0.002$ ) was improved to control levels.

### Analysis of IgA-producing process

We hypothesized that MCD-mediated attenuation of intestinal barrier function would include not only disruption of tight junctions but also that of mucosal immunity due reduced IgA production. Thus, we analyzed IgA-positive cells in ileal and colonic tissues. In the ileal tissue, there were more IgA-positive cells in MCD + FOS mice ( $155.2 \pm 8.7$  cells) than in Control ( $121.2 \pm 10.9$  cells) and MCD mice ( $98.4 \pm 15.0$  cells) ( $p = 0.001$ ). It was similar in the colonic tissue: there were more IgA-positive cells in MCD + FOS mice ( $89.1 \pm 13.3$  cells) than in

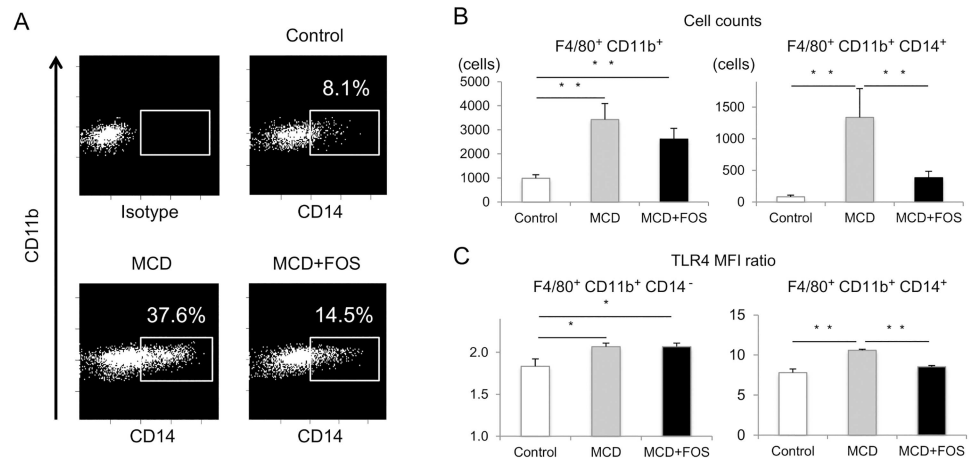

**Fig 4. Flow cytometric analysis of F4/80<sup>+</sup> CD11b<sup>+</sup> Kupffer cells in the livers of MCD-fed mice with or without FOS treatment.** A, Frequency of CD14<sup>+</sup> Kupffer cells. B, Cell counts of total Kupffer cells and CD14<sup>+</sup> Kupffer cells. \* p < 0.05. C, Mean fluorescence intensity ratio of Toll-like receptor 4 in CD14<sup>-</sup> and CD14<sup>+</sup> Kupffer cells. \* p < 0.05.

<https://doi.org/10.1371/journal.pone.0175406.g004>

Control (79.3 ± 21.1) and MCD mice (66.4 ± 8.4 cells) (p = 0.03) (Fig 6b). It was recognized that the IgA concentration in feces was 1.3 ± 0.1 µg/g in control mice, compared to 1.0 ± 0.1 µg/g in MCD mice (p = 0.01; Fig 6c) and 1.7 ± 0.1 µg/g in MCD + FOS mice (p = 0.003).

MCD mice exhibited significant weight loss (18.8 ± 1.2 g, vs. Control's 28.0 ± 1.3 g; p = 0.003) and shortening of cecal length (14.3 ± 0.1 mm, vs. Control's 26.8 ± 0.1 mm; p = 0.004; Fig 7a and 7b). Although MCD + FOS mice had a similar weight as that of MCD mice (19.7 ± 1.1 g; p = 0.3), cecal length was longer in MCD + FOS mice than in MCD mice (31.8 ± 0.1 mm; p = 0.003). When we performed IgA staining of the cecal patch to investigate the IgA-producing cells, we observed IgA-positive cells in the follicle and germinal center of control and MCD + FOS mice, which we hardly observed in MCD mice (Fig 7c and 7d). To identify whether FOS can differentiate cecal patch B cells to IgA-producing cells, we analyzed B cells in cecal patch using flow cytometry. The number of CD19<sup>+</sup> cells in the cecal patch showed no difference in each group (Fig 7e), but CD38, a B cell activation marker, was expressed more in MCD + FOS mice (2.5 ± 0.2) than in MCD mice (1.7 ± 0.3) (p = 0.02) (Fig 7f).

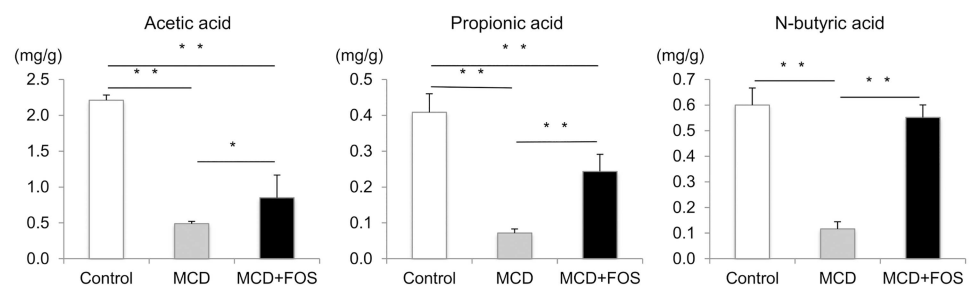

**Fig 5. Fecal short-chain fatty acid concentrations of MCD-fed mice with or without FOS treatment.** \* p = 0.04, \*\* p < 0.01.

<https://doi.org/10.1371/journal.pone.0175406.g005>



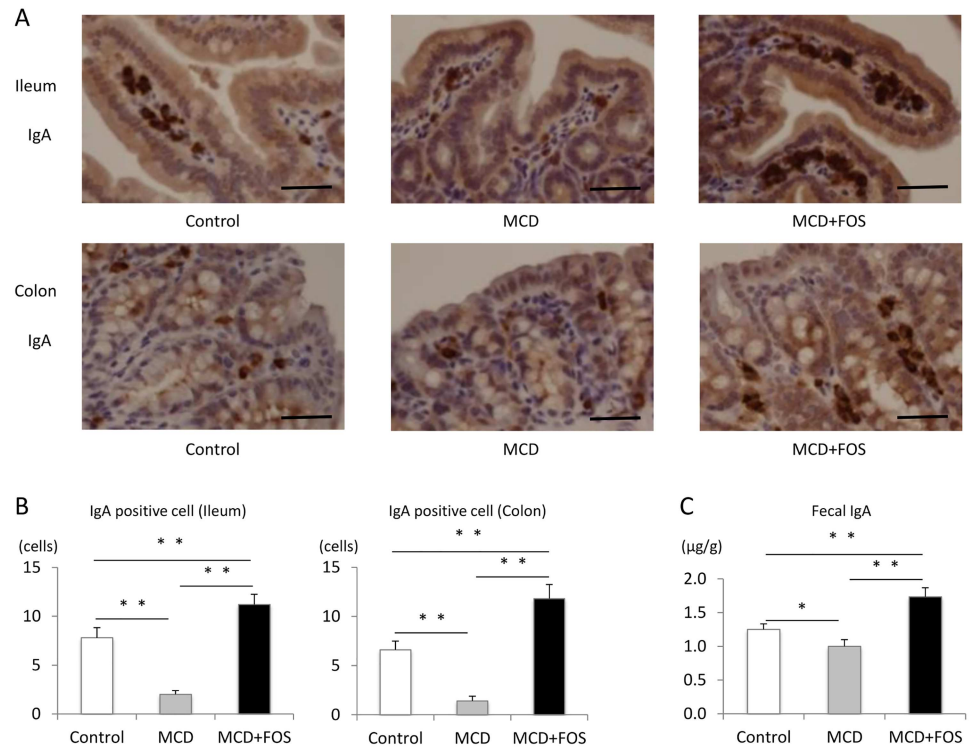

**Fig 6. Immunohistochemical evaluation of IgA in ileal and colonic tissues and fecal IgA concentrations of MCD-fed mice with or without FOS treatment.** A. Villus IgA staining in each group ( $\times 600$ . Bar = 100  $\mu\text{m}$ ). B. Villus IgA-positive cells in each group.  $** p < 0.01$ . C. Fecal IgA concentration in each group.  $* p = 0.01$ ,  $** p = 0.003$ .

<https://doi.org/10.1371/journal.pone.0175406.g006>

## Discussion

Mice that were fed an MCD developed steatohepatitis because large quantities of free fatty acids from white adipose tissue flow into the liver [18] and hepatic VLDL secretion is impaired [19]. As a limitation of this MCD-fed NASH animal model, the model does not reflect obesity or insulin resistance, but there is merit to causing NASH in the short term in comparison with high-fat diet feeding [20].

The existence of dysbiosis in NASH was reported as follows: decreased *Bacteroides* spp. and increased *Proteobacteria*, *Escherichia*, or *Clostridium coccoides* [21, 22] from an examination of patient feces and decreased *Lactobacillales* [23] in an MCD animal model.

In this study, we hypothesized that improvements of dysbiosis induced by FOSs can delay the onset of NASH, and examined this hypothesis in mice fed an MCD. Compared to control mice, *Clostridium* cluster counts were increased and those of *Lactobacillales* spp. were decreased in the feces of MCD mice. Concentrations of short-chain fatty acids and IgA in feces were also decreased. ZO-1 staining between ileal intraepithelial cells was diminished. In the liver, fibrosis was not observed because of the short duration of examination, but hepatic steatosis and inflammatory cell infiltration were observed. The percentage of CD14-positive Kupfer cells was increased, and TLR4 expression in these cells was upregulated.

As shown in Fig 8, the mechanism of intestinal barrier dysfunction is believed to be associated with decreased short-chain fatty acid production by intestinal bacteria, resulting in the depletion of energy sources for intestinal epithelial cells and a disordered homeostasis of intestinal mucosal immunity [7–9]. Through the disrupted intestinal barrier, it is assumed that

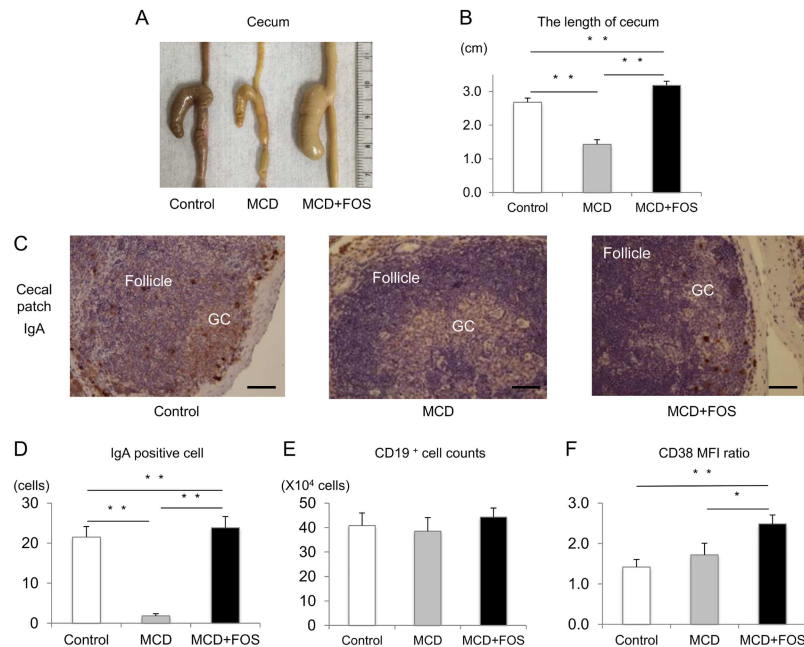

**Fig 7. Cecal findings of MCD-fed mice with or without FOS treatment.** A. and B. Macroscopic findings and mean length of the cecum in each group. \*\* p < 0.01. C. IgA staining of the cecal patch in each group (× 600. Bar = 100 μm). GC denotes germinal center. D. IgA-positive cell counts in each group. \*\* p < 0.01. E. Flow cytometric analysis of CD19<sup>+</sup> B cell numbers (E) and mean fluorescence intensity ratio of CD38 (F) in each group. \* p = 0.02.

<https://doi.org/10.1371/journal.pone.0175406.g007>

PAMPs flow into the liver in large quantities [11, 12] and accelerate the production of inflammatory cytokines by Kupffer cells. Some reports identified high concentrations of endotoxin in the portal venous blood [11, 12] and enhanced expression of CD14 and TLR4 in Kupffer cells [13].

It is reported that FOSs increase *Bifidobacterium* and *Lactobacillales* spp. counts in the gastrointestinal tract. These bacteria produce short-chain fatty acids, which strengthen tight junctions by nourishing intestinal epithelial cells [9, 14, 24], as well as stimulate the differentiation

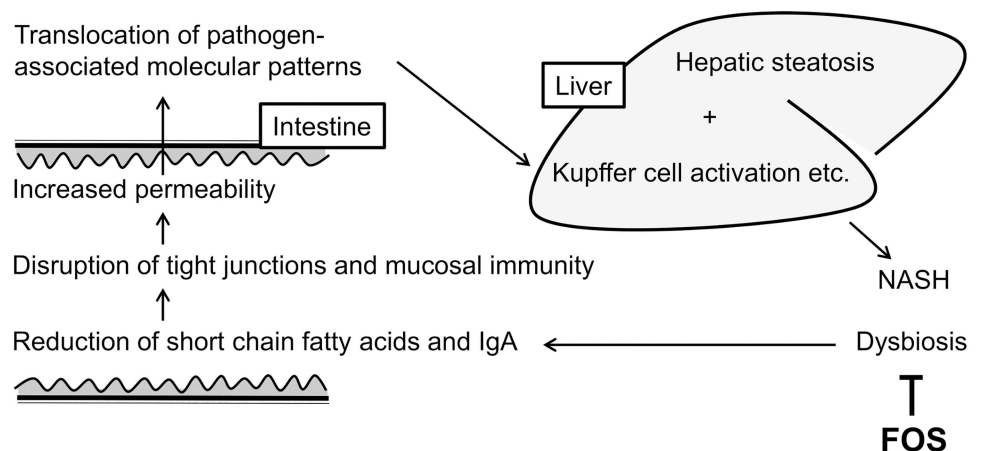

**Fig 8. The supposed mechanism by which dysbiosis influences nonalcoholic steatohepatitis and its regulation by fructo-oligosaccharides.**

<https://doi.org/10.1371/journal.pone.0175406.g008>

of IgA-producing cells in the cecum and promote IgA secretion from intestinal mucosa [25, 26]. Our examination using MCD mice revealed that FOSs improved dysbiosis, increased *Lactobacillales* spp. counts, enhanced short-chain fatty acid production by intestinal bacteria, and improved ZO-1 staining in tight junctions. FOSs increased the number of IgA-positive cells in the germinal center of cecal patches and significantly reinforced IgA secretion by intestinal villi. Surprisingly, hepatic steatosis and inflammatory cell infiltration were decreased by FOS administration. The percentage of CD14-positive Kupffer cells and expression of TLR4 were also decreased. This report is the first to demonstrate that FOSs controlled the onset of NASH. This study was a small animal study with a short duration; in fact, no liver fibrosis was observed. This study is preliminary, and it should be followed by larger studies with longer durations to clarify the implications for human NASH. Together with the fact that we did not use another NASH model animal, these are limitations of our study; our findings support FOS administration as an effective treatment for NASH.

As a reason why steatohepatitis was improved by FOS administration, changes of the microbial flora may accelerate  $\beta$ -oxidation in the liver [27, 28]. In addition, short-chain fatty acids may both enhance intestinal barrier function and improve NASH directly. Adipose tissue expresses short-chain fatty acid receptors, which act to improve insulin resistance in the liver and muscle by inhibiting fat accumulation [29]. Furthermore, short-chain fatty acids act on the L cells of the intestinal tract, which promote GLP-1 secretion [30]. Further examination will reveal the direct action of FOSs in the liver.

Some methods to resolve dysbiosis have been reported. Recently, it was demonstrated that fecal microbiota transplantation (FMT) from healthy people is effective for treating patients with recurrent *Clostridium* infection [31]. The effectiveness of FMT in treating inflammatory bowel disease and irritable bowel syndrome, which are thought to involve dysbiosis, has also been suggested [32]. Serious side effects of FMT were not reported, but an evaluation of its effectiveness and safety is underway in Japan. Meanwhile, the replacement of useful bacteria as probiotics has been examined in NASH animal models. Velayudham *et al.* confirmed the downregulation of TLR4 and CD14 mRNA expression in the liver and the attenuation of hepatic fibrosis in MCD mice fed VSL#3, which is a probiotic that includes eight types of useful bacteria, for 10 weeks. However, they could not confirm a significant suppressive effect on hepatic steatosis and inflammation [33]. Endo *et al.* confirmed the reinforcement of tight junctions between intestinal epithelial cells and improvements of hepatic steatosis and fibrosis of choline-deficient/L-amino acid-defined diet-fed rats administered butyric acid-producing bacteria for 8–50 weeks [34]. However, it is difficult to reverse dysbiosis through the administration of single bacteria species.

To date, there is no approved therapy for improving NASH. Our study provided a potential dietary strategy for preventing and treating NASH. Prebiotics such as FOSs are present in onions, garlic, soybeans, and burdock, or are produced industrially as a syrup. They are more capable of being easily consumed habitually and continuously than probiotics. We believe FOSs can greatly contribute to a healthy life.

In conclusion, this study illustrated that in the MCD mouse model, dietary FOSs can restore the normal gastrointestinal microflora and normal intestinal epithelial barrier function and decrease steatohepatitis. The findings support the role of prebiotics such as FOSs in maintaining a normal gastrointestinal microbiome; they also support the need for further studies on the prevention or treatment of NASH using dietary FOSs.

## Acknowledgments

The authors thank Dr. Munehiro Honda for outstanding flow cytometric assistance. The authors would like to thank Enago ([www.enago.jp](http://www.enago.jp)) for the English language review.

## Author Contributions

**Conceptualization:** KM MI KT KK HT YM KO MH IY HM.

**Data curation:** KK.

**Formal analysis:** KM MI KT KK.

**Funding acquisition:** KK.

**Investigation:** KM MI KT KK.

**Methodology:** KM MI KT KK.

**Project administration:** KK.

**Resources:** KK.

**Software:** KK.

**Supervision:** KM KK.

**Validation:** KK HT YM KO MH IY HM.

**Visualization:** KK.

**Writing – original draft:** KK.

**Writing – review & editing:** KK HT YM KO MH IY HM.

## References

1. Hashimoto E, Taniai M, Tokushige K. Characteristics and diagnosis of NAFLD/NASH. *J Gastroenterol Hepatol*. 2013; 28: 64–70. <https://doi.org/10.1111/jgh.12271> PMID: 24251707
2. Ludwig J, Viggiano TR, McGill DB, Oh BJ. Nonalcoholic steatohepatitis: Mayo Clinic experiences with a hitherto unnamed disease. *Mayo Clin Proc*. 1980; 55: 434–438. PMID: 7382552
3. Hashimoto E, Yatsuji S, Kaneda H, Yoshioka Y, Taniai M, Tokushige K, et al. The characteristics and natural history of Japanese patients with nonalcoholic fatty liver disease. *Hepatol Res*. 2005; 33: 72–76. <https://doi.org/10.1016/j.hepres.2005.09.007> PMID: 16203174
4. Festi D, Schiumerini R, Birtolo C, Marzi L, Montrone L, Scaiola E, et al. Gut microbiota and its pathophysiology in disease paradigms. *Dig Dis*. 2011; 29: 518–524. <https://doi.org/10.1159/000332975> PMID: 22179206
5. Robles Alonso V, Guarner F. Linking the gut microbiota to human health. *Br J Nutr*. 2013; 109: S21–26. <https://doi.org/10.1017/S0007114512005235> PMID: 23360877
6. Wong VW, Tse CH, Lam TT, Wong GL, Chim AM, Chu WC, et al. Molecular characterization of the fecal microbiota in patients with nonalcoholic steatohepatitis—a longitudinal study. *PLoS One*. 2013; 8: e62885. <https://doi.org/10.1371/journal.pone.0062885> PMID: 23638162
7. Wigg AJ, Roberts-Thomson IC, Dymock RB, McCarthy PJ, Grose RH, Cummins AG. The role of small intestinal bacterial overgrowth, intestinal permeability, endotoxaemia, and tumour necrosis factor  $\alpha$  in the pathogenesis of non-alcoholic steatohepatitis. *Gut*. 2001; 48: 206–211. <https://doi.org/10.1136/gut.48.2.206> PMID: 11156641
8. Miele L, Valenza V, La Torre G, Montalto M, Cammarota G, Ricci R, et al. Increased intestinal permeability and tight junction alterations in nonalcoholic fatty liver disease. *Hepatology*. 2009; 49: 1877–1887. <https://doi.org/10.1002/hep.22848> PMID: 19291785
9. Ohata A, Usami M, Miyoshi M. Short-chain fatty acids alter tight junction permeability in intestinal monolayer cells via lipoxigenase activation. *Nutrition*. 2005; 21: 838–847. <https://doi.org/10.1016/j.nut.2004.12.004> PMID: 15975492
10. Dai X, Wang B. Role of Gut barrier function in the pathogenesis of nonalcoholic fatty liver disease. *Gastroenterol Res Pract*. 2015; 2015: 287348. <https://doi.org/10.1155/2015/287348> PMID: 25945084
11. Pendyala S, Walker JM, Holt PR. A high-fat diet is associated with endotoxemia that originates from the gut. *Gastroenterology*. 2012; 142: 1100–1101. <https://doi.org/10.1053/j.gastro.2012.01.034> PMID: 22326433

12. Jin R, Willment A, Patel SS, Sun X, Song M, Mannery YO, et al. Fructose induced endotoxemia in pediatric nonalcoholic Fatty liver disease. *Int J Hepatol*. 2014; 2014: 560620. <https://doi.org/10.1155/2014/560620> PMID: 25328713
13. Imajo K, Fujita K, Yoneda M, Nozaki Y, Ogawa Y, Shinohara Y, et al. Hyperresponsivity to low-dose endotoxin during progression to nonalcoholic steatohepatitis is regulated by leptin-mediated signaling. *Cell Metab*. 2012; 16: 44–54. <https://doi.org/10.1016/j.cmet.2012.05.012> PMID: 22768838
14. Hidaka H, Hirayama M, Tokunaga T, Eida T. The effects of undigestible fructooligosaccharides on intestinal microflora and various physiological functions on human health. *Adv Exp Med Biol*. 1990; 270: 105–117. PMID: 2077879
15. Gibson GR, Roberfroid MB. Dietary modulation of the human colonic microbiota: introducing the concept of prebiotics. *J Nutr*. 1995; 125: 1401–1412. PMID: 7782892
16. Kleiner DE, Brunt EM, Van Natta M, Behling C, Contos MJ, Cummings OW, et al. Design and validation of a histological scoring system for nonalcoholic fatty liver disease. *Hepatology*. 2005; 41: 1313–1321. <https://doi.org/10.1002/hep.20701> PMID: 15915461
17. Nagashima K, Hisada T, Sato M, Mochizuki J. Application of new primer-enzyme combinations to terminal restriction fragment length polymorphism profiling of bacterial populations in human feces. *Appl Environ Microbiol*. 2003; 69: 1251–1262. <https://doi.org/10.1128/AEM.69.2.1251-1262.2003> PMID: 12571054
18. Jha P, Claudel T, Baghdasaryan A, Mueller M, Halilbasic E, Das SK, et al. Role of adipose triglyceride lipase (PNPLA2) in protection from hepatic inflammation in mouse models of steatohepatitis and endotoxemia. *Hepatology*. 2014; 59: 858–869. <https://doi.org/10.1002/hep.26732> PMID: 24002947
19. Rinella ME, Elias MS, Smolak RR, Fu T, Borensztajn J, Green RM. Mechanisms of hepatic steatosis in mice fed a lipogenic methionine choline-deficient diet. *J Lipid Res*. 2008; 49: 1068–1076. <https://doi.org/10.1194/jlr.M800042-JLR200> PMID: 18227531
20. Larter CZ, Yeh MM. Animal models of NASH: getting both pathology and metabolic context right. *J Gastroenterol Hepatol*. 2008; 23: 1635–1648. <https://doi.org/10.1111/j.1440-1746.2008.05543.x> PMID: 18752564
21. Mouzaki M, Comelli EM, Arendt BM, Bonengel J, Fung SK, Fischer SE, et al. Intestinal microbiota in patients with nonalcoholic fatty liver disease. *Hepatology*. 2013; 58: 120–127. <https://doi.org/10.1002/hep.26319> PMID: 23401313
22. Zhu L, Baker SS, Gill C, Liu W, Alkhouri R, Baker RD, et al. Characterization of gut microbiomes in non-alcoholic steatohepatitis (NASH) patients: a connection between endogenous alcohol and NASH. *Hepatology*. 2013; 57: 601–609. <https://doi.org/10.1002/hep.26093> PMID: 23055155
23. Okubo H, Sakoda H, Kushiya A, Fujishiro M, Nakatsu Y, Fukushima T, et al. *Lactobacillus casei* strain Shirota protects against nonalcoholic steatohepatitis development in a rodent model. *Am J Physiol Gastrointest Liver Physiol*. 2013; 305: G911–918. <https://doi.org/10.1152/ajpgi.00225.2013> PMID: 24113768
24. Campbell JM, Fahey GC Jr, Wolf BW. Selected indigestible oligosaccharides affect large bowel mass, cecal and fecal short-chain fatty acids, pH and microflora in rats. *J Nutr*. 1997; 127: 130–136. PMID: 9040556
25. Nakamura Y, Nosaka S, Suzuki M, Nagafuchi S, Takahashi T, Yajima T, et al. Dietary fructooligosaccharides up-regulate immunoglobulin A response and polymeric immunoglobulin receptor expression in intestines of infant mice. *Clin Exp Immunol*. 2004; 137: 52–58. <https://doi.org/10.1111/j.1365-2249.2004.02487.x> PMID: 15196243
26. Masahata K, Umemoto E, Kayama H, Kotani M, Nakamura S, Kurakawa T, et al. Generation of colonic IgA-secreting cells in the caecal patch. *Nat Commun*. 2014; 5: 3704. <https://doi.org/10.1038/ncomms4704> PMID: 24718324
27. Pachikian BD, Essaghir A, Demoulin JB, Catry E, Neyrinck AM, Dewulf EM, et al. Prebiotic approach alleviates hepatic steatosis: Implication of fatty acid oxidative and cholesterol synthesis pathways. *Mol Nutr Food Res*. 2013; 57: 347–359. <https://doi.org/10.1002/mnfr.201200364> PMID: 23203768
28. Yan H, Potu R, Lu H, Vezzoni de Almeida V, Stewart T, Ragland D, et al. Dietary fat content and fiber type modulate hind gut microbial community and metabolic markers in the pig. *PLoS One*. 2013; 8: e59581. <https://doi.org/10.1371/journal.pone.0059581> PMID: 23573202
29. Kimura I, Ozawa K, Inoue D, Imamura T, Kimura K, Maeda T, et al. The gut microbiota suppresses insulin-mediated fat accumulation via the short-chain fatty acid receptor GPR43. *Nat Commun*. 2013; 4: 1829. <https://doi.org/10.1038/ncomms2852> PMID: 23652017
30. Tolhurst G, Heffron H, Lam YS, Parker HE, Habib AM, Diakogiannaki E, et al. Short-chain fatty acids stimulate glucagon-like peptide-1 secretion via the G-protein-coupled receptor FFAR2. *Diabetes*. 2012; 61: 364–371. <https://doi.org/10.2337/db11-1019> PMID: 22190648

31. van Nood E, Vrieze A, Nieuwdorp M, Fuentes S, Zoetendal EG, de Vos WM, et al. Duodenal infusion of donor feces for recurrent *Clostridium difficile*. *N Engl J Med*. 2013; 368: 407–415. <https://doi.org/10.1056/NEJMoa1205037> PMID: 23323867
32. Smits LP, Bouter KE, de Vos WM, Borody TJ, Nieuwdorp M. Therapeutic potential of fecal microbiota transplantation. *Gastroenterology*. 2013; 145: 946–953. <https://doi.org/10.1053/j.gastro.2013.08.058> PMID: 24018052
33. Velayudham A, Dolganiuc A, Ellis M, Petrasek J, Kodys K, Mandrekar P, et al. VSL#3 probiotic treatment attenuates fibrosis without changes in steatohepatitis in a diet-induced nonalcoholic steatohepatitis model in mice. *Hepatology*. 2009; 49: 989–997. <https://doi.org/10.1002/hep.22711> PMID: 19115316
34. Endo H, Niioka M, Kobayashi N, Tanaka M, Watanabe T. Butyrate-producing probiotics reduce nonalcoholic fatty liver disease progression in rats: new insight into the probiotics for the gut-liver axis. *PLoS One*. 2013; 8: e63388. <https://doi.org/10.1371/journal.pone.0063388> PMID: 23696823
